# Supplementary material for: Effect of Myostatin Gene Mutation on Slaughtering Performance and Meat Quality in Marchigiana Bulls
Source: MDPI journal article supplement (doi:10.3390/ani12040518), 2022-02-19
Supplement: s1 [file s1]

**Table S1.** Average chemical composition of ration ingredients on dry matter (%) basis (mean  $\pm$  standard deviation).

| Parameter (%)           | Hay                           | Concentrate                   |
|-------------------------|-------------------------------|-------------------------------|
|                         | Mean $\pm$ Standard Deviation | Mean $\pm$ Standard Deviation |
| Moisture                | 11.73 $\pm$ 2.57              | 12.77 $\pm$ 1.05              |
| Dry Matter              | 88.27 $\pm$ 2.57              | 87.23 $\pm$ 1.05              |
| Crude Protein           | 8.96 $\pm$ 3.92               | 15.65 $\pm$ 1.98              |
| Ether Extract           | 1.52 $\pm$ 0.50               | 3.03 $\pm$ 0.57               |
| Crude Fiber             | 34.19 $\pm$ 4.04              | 5.83 $\pm$ 1.02               |
| Neutral Detergent Fiber | 65.90 $\pm$ 7.49              | 24.16 $\pm$ 3.41              |
| Acid Detergent Fiber    | 45.44 $\pm$ 4.83              | 9.78 $\pm$ 1.07               |
| Acid Detergent Lignin   | 9.12 $\pm$ 2.18               | 3.98 $\pm$ 1.29               |
| Ash                     | 8.55 $\pm$ 1.42               | 6.66 $\pm$ 1.92               |

**Table S2.** Genotype distribution at *MSTN* locus: comparison by  $\chi^2$  test (df in square parentheses) between two different samples of Marchigiana beef cattle (relative frequencies are shown in parentheses).

|                     | N   | <i>MSTN</i> Genotype            |             |
|---------------------|-----|---------------------------------|-------------|
|                     |     | +/+                             | +/-         |
| Present study       | 78  | 67 (85.90%)                     | 11 (14.10%) |
| Lasagna et al. [30] | 279 | 227 (81.37%)                    | 52 (18.63%) |
| Chi-square Test     |     | $\chi^2_{[1]} = 0.86; P = 0.35$ |             |

Numbers within square brackets indicate the degree of freedom.
